# Supplementary material for: Disruption of Mouse Cenpj, a Regulator of Centriole Biogenesis, Phenocopies Seckel Syndrome
Source: PubMed Central journal article supplement (PMC3499256; doi:10.1371/journal.pgen.1003022), 2012-11-15

A

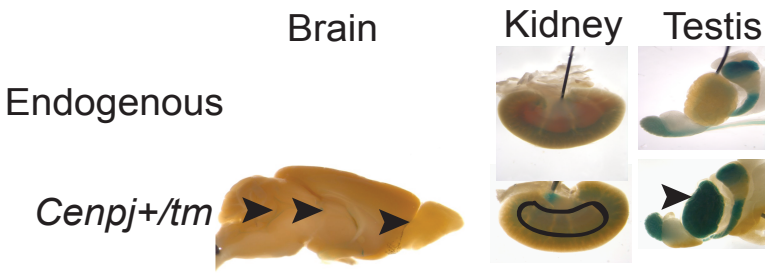

B

| Exons spliced | Relative to wild-type (%) |              | Relative to wild-type exons one and two (%) |              |
|---------------|---------------------------|--------------|---------------------------------------------|--------------|
|               | WT                        | <i>tm/tm</i> | WT                                          | <i>tm/tm</i> |
| 3 to 6        | 100±17                    | 444±95       | 0.35±0.2                                    | 1.5±0.3      |
| 4 to 5        | 100±19                    | 2.1±0.5      | 144±31                                      | 2.9±0.7      |
| 4 to 6        | 100±26                    | 2.1±0.5      | 40±9                                        | 0.9±0.2      |

C

|                                 |                                                                                                                                                                                                                                                                                                                                                 |
|---------------------------------|-------------------------------------------------------------------------------------------------------------------------------------------------------------------------------------------------------------------------------------------------------------------------------------------------------------------------------------------------|
| Truncated Cenpj (spliced Ex3-6) | MFLMPTSSELNSGQNFLTQWMTSPSRAGVILNRGFPPILEADDKQA<br>ATNVSTSFPAKATHFSNSFSISSEEDSFHEEQKLEAGGPYKPWSE<br>NPEAPPVFPVSRKEPIASRQDAPGCQEDNNNDLTPHLESEFKEVA<br>NKNPLFKKLEQLKEIQKKQEQLKRQQLLEQLQRLMEEQEKLTMV<br>SAQHAFPGPSKLLERSRHLRTT StopKSRSNWKSGLDRSSC                                                                                                  |
| Truncated Cenpj (spliced Ex4-6) | MFLMPTSSELNSGQNFLTQWMTSPSRAGVILNRGFPPILEADDKQA<br>ATNVSTSFPAKATHFSNSFSISSEEDSFHEEQKLEAGGPYKPWSE<br>NPEAPPVFPVSRKEPIASRQDAPGCQEDNNNDLTPHLESEFKEVA<br>NKNPLFKKLEQLKEIQKKQEQLKRQQLLEQLQRLMEEQEKLTMV<br>SAQHAFPGTLLPDDQSQKHRSPGDLTLPPHSYSNPTQENSCASNV<br>LPDEQSNFCRATQDSVLTSKNASDLFYESQYQEAHVKRNDLKEES<br>PAHPSPGPSKLLERSRHLRTT StopKSRSNWKSGLDRSSC |

D

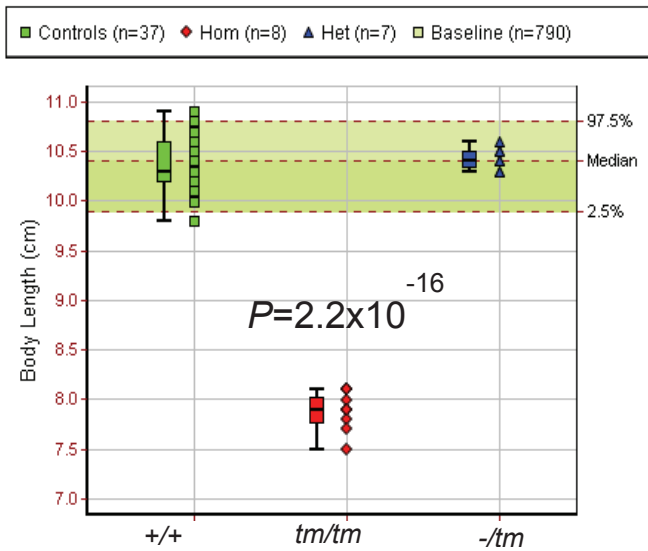

F

| Karyotype     | % of metaphases (n=20) |              |
|---------------|------------------------|--------------|
|               | <i>Cenpj+/+</i>        | <i>Cenpj</i> |
| 2N            | 80                     | 25           |
| 2N+numerical  | 10                     | 10           |
| 2N+structural | 5                      | 0            |
| 4N            | 5                      | 40           |
| 4N+numerical  | 0                      | 15           |
| 4N+structural | 0                      | 5            |
| >8N           | 0                      | 5            |

E

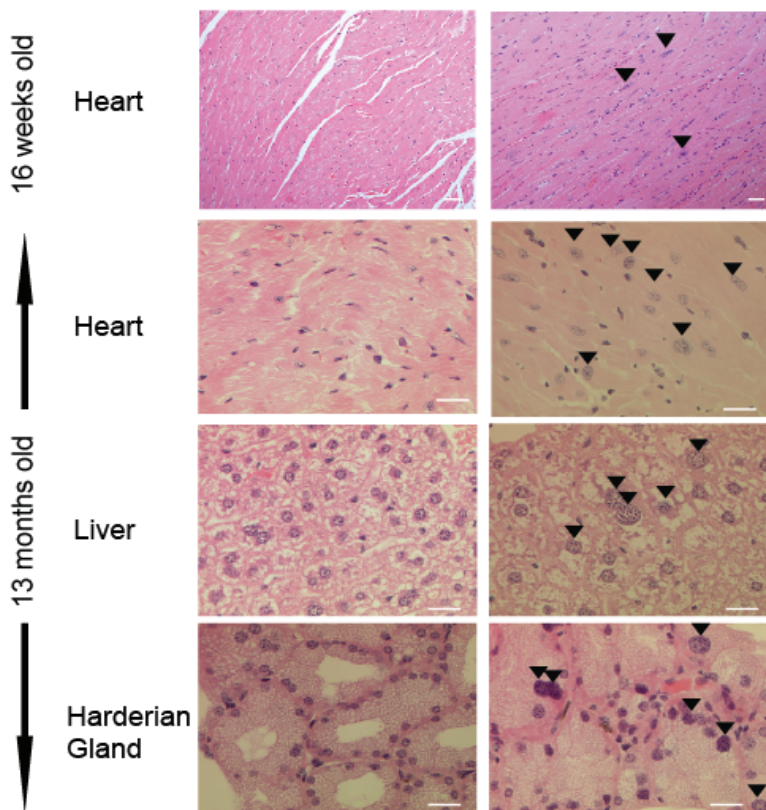

G

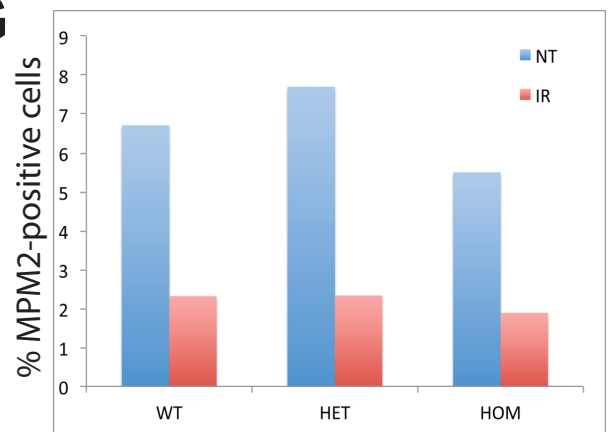

Supplement: pgen.1003022.s002.pdf [file pgen.1003022.s002.pdf]
