# Supplementary material for: Disruption of Mouse Cenpj, a Regulator of Centriole Biogenesis, Phenocopies Seckel Syndrome
Source: PubMed Central journal article supplement (PMC3499256; doi:10.1371/journal.pgen.1003022), 2012-11-15
Supplement: pgen.1003022.s003.pdf [file pgen.1003022.s003.pdf]

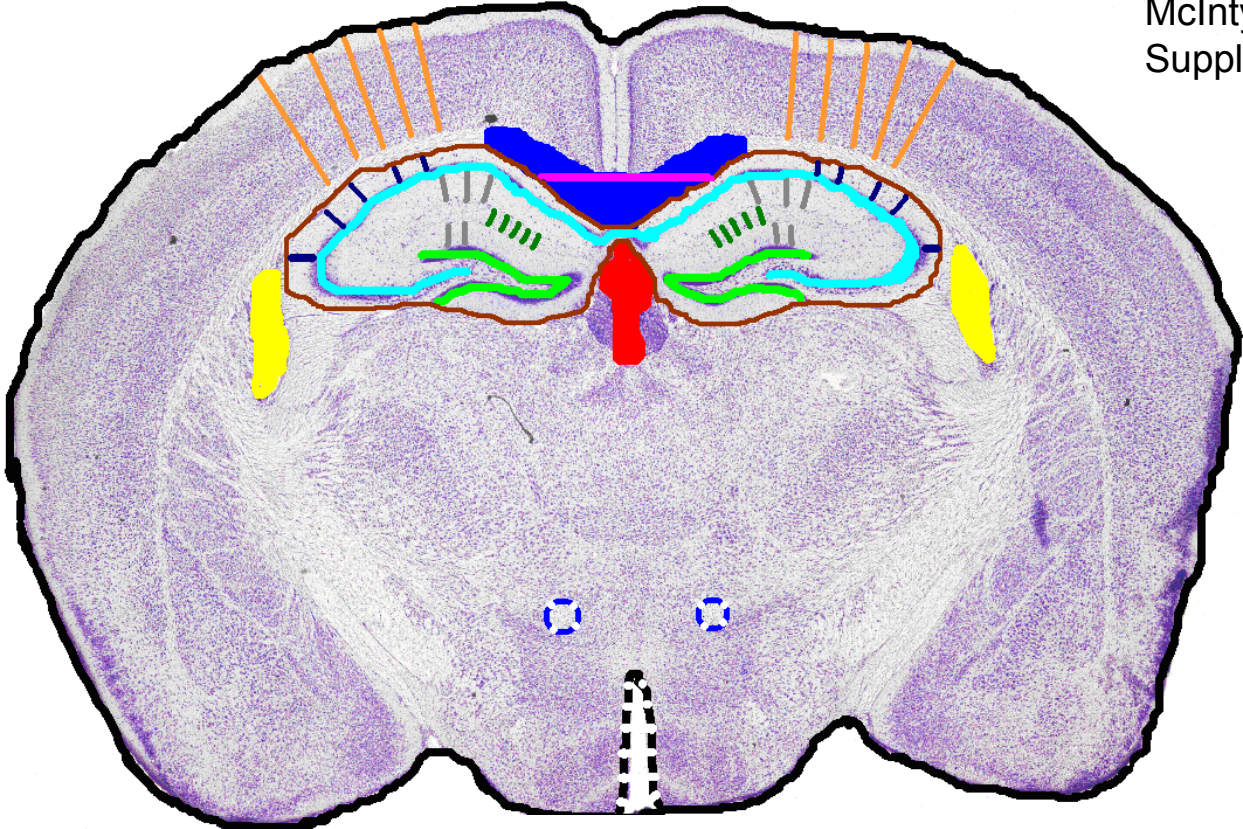

 Dorsal 3<sup>rd</sup> ventricle area

 Total lateral ventricle area

 Corpus callosum area

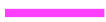 Corpus callosum max span

 Average cortical thickness

 Thalamus

 Total internal length of pyramidal cell layer of hippocampus

 Average thickness of molecular layer of hippocampus

 Average thickness of stratum radiatum of hippocampus

 Average thickness of oriens layer of hippocampus

 Total brain section area

 Mammillothalamic tract

 Caudate

 Total internal length dentate gyrus
