# Supplementary material for: Disruption of Mouse Cenpj, a Regulator of Centriole Biogenesis, Phenocopies Seckel Syndrome
Source: PubMed Central journal article supplement (PMC3499256; doi:10.1371/journal.pgen.1003022), 2012-11-15

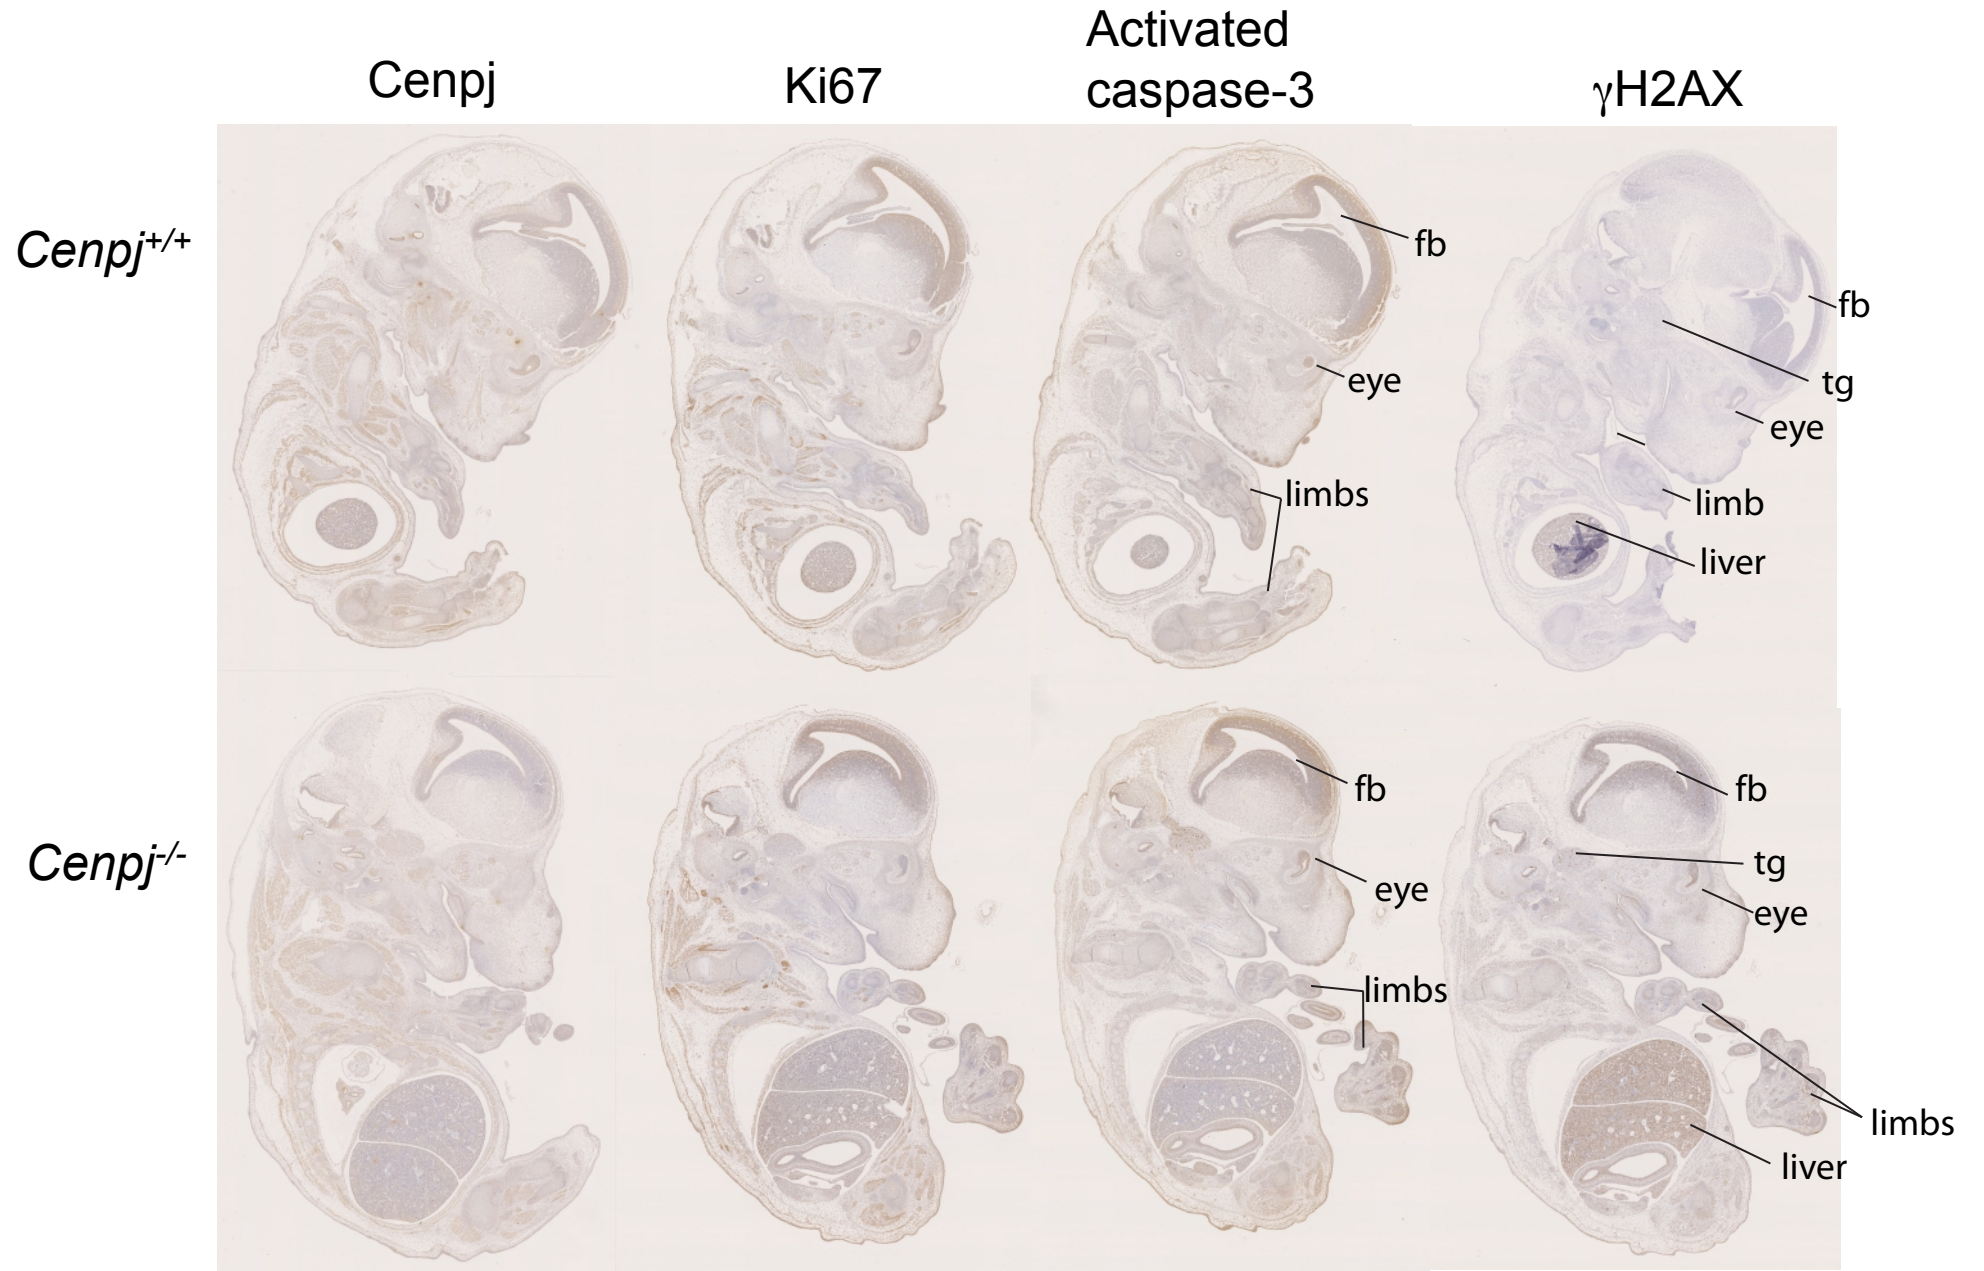

McIntyre et al., Supp. Fig 4.

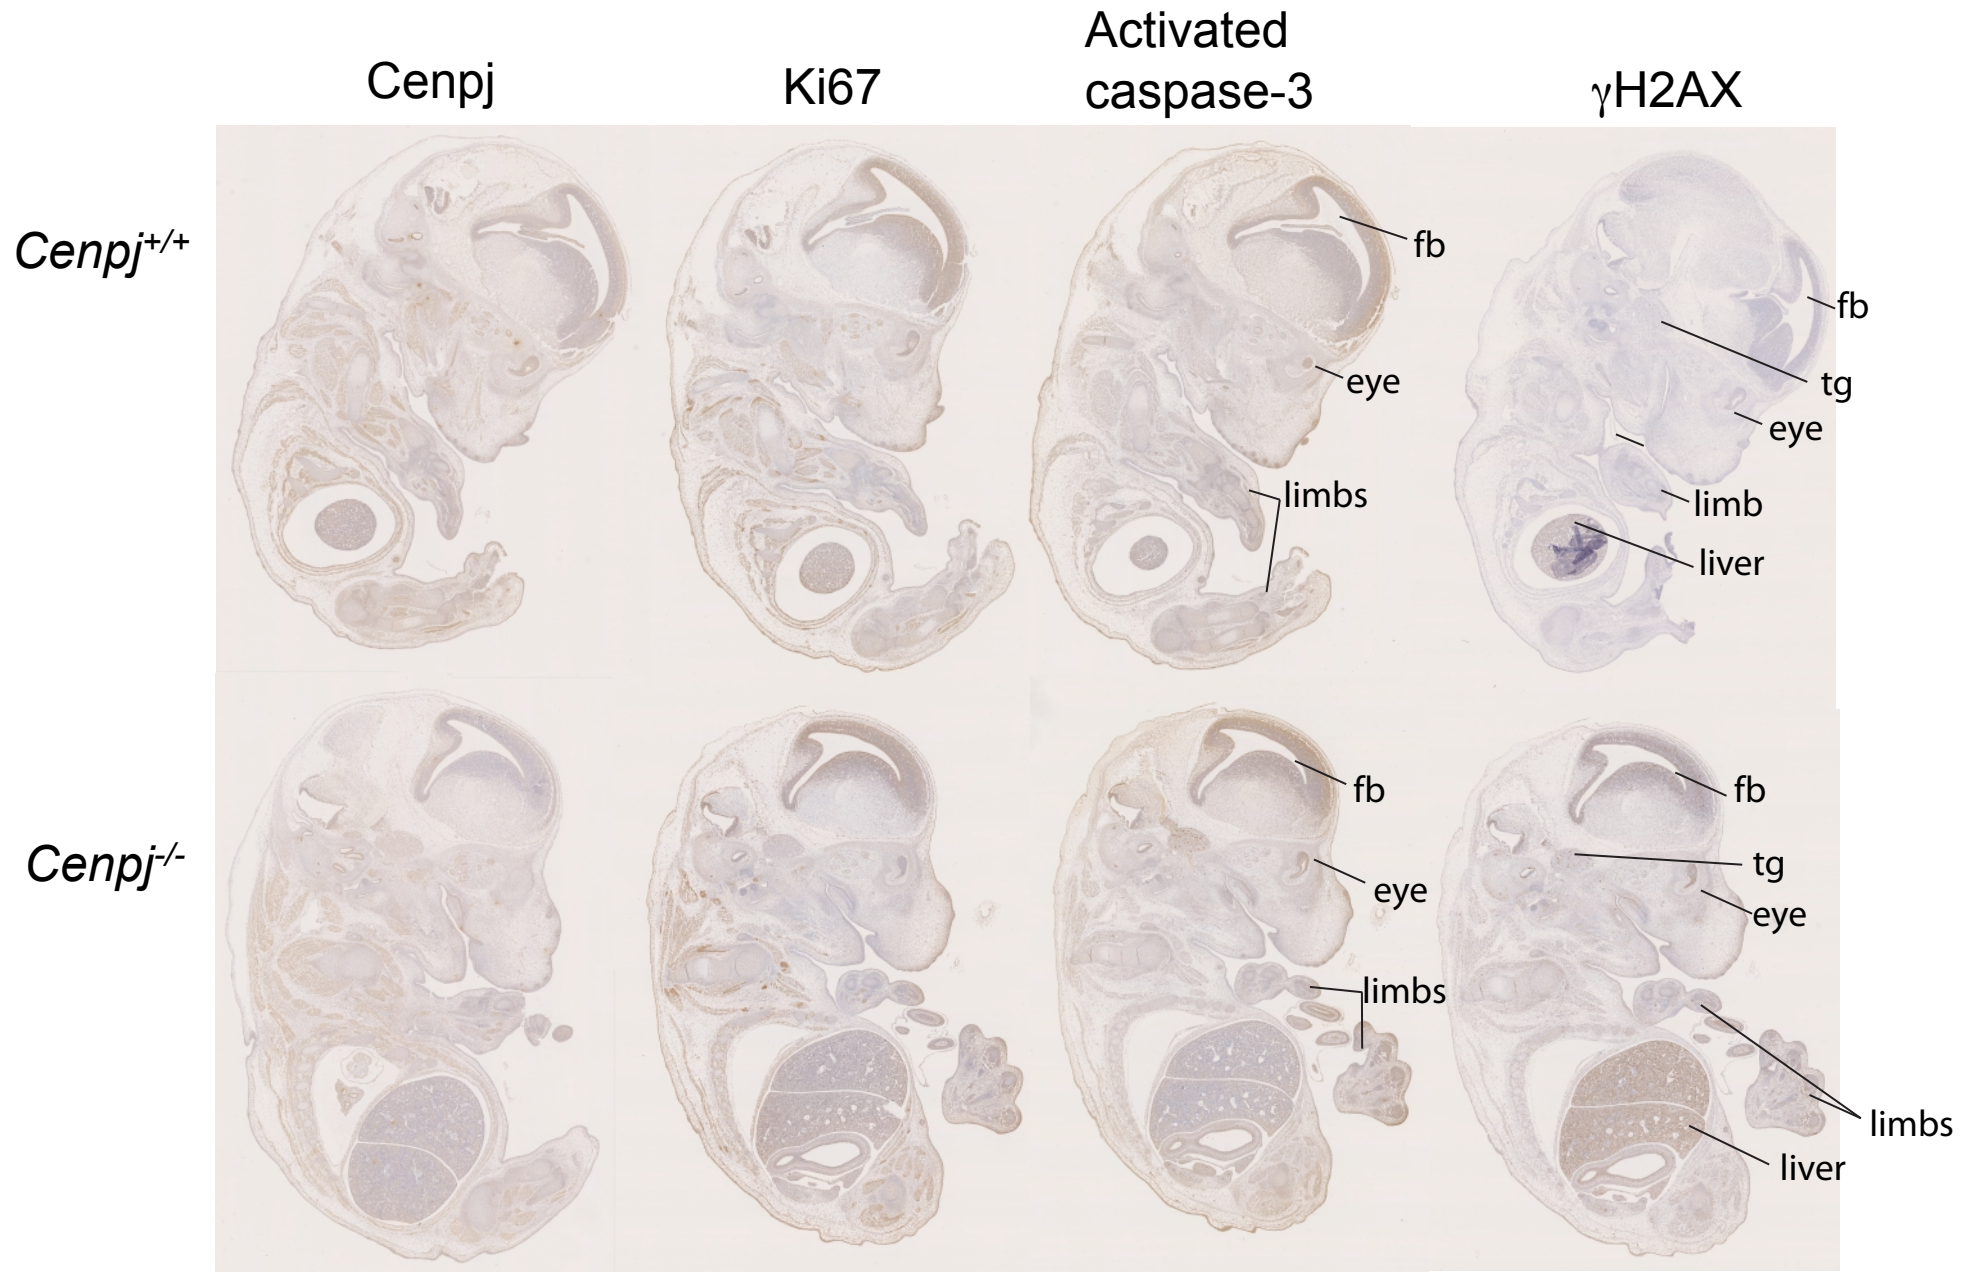

McIntyre et al., Supp. Fig 4.



McIntyre et al., Supp. Fig 4.



Supplement: pgen.1003022.s004.pdf [file pgen.1003022.s004.pdf]
